# Supplementary material for: Small molecular nanomedicines made from a camptothecin dimer containing a disulfide bond
Source: Royal Society of Chemistry journal article supplement (doi:10.1039/c5ra18586f), 2015-01-01
Supplement: c5ra18586f1.pdf [file c5ra18586f1.pdf]

Supplemental information for

**Small molecular nanomedicines formed from camptothecin  
dimer containing disulfide bond**

Qing Pei,<sup>a,b</sup> Xiuli Hu,<sup>a</sup> Zhensheng Li,<sup>a</sup> Zhigang Xie<sup>\*,a</sup>, Xiabin Jing<sup>a</sup>

*<sup>a</sup>State Key Laboratory of Polymer Physics and Chemistry, Changchun Institute of Applied Chemistry, Chinese Academy of Sciences, Changchun 130022, P. R. China. Email: [xiez@ciac.ac.cn](mailto:xiez@ciac.ac.cn), Fax/Tel: +86 431 85262775*

*<sup>b</sup>The University of Chinese Academy of Sciences, Beijing 100049, P. R. China*

## **Experimental details**

**Materials.** All starting materials were purchased from commercial suppliers and used without further purification unless otherwise noted. Solvents for chemical synthesis were purified by distillation.

**Synthesis of CPT-s-s-CPT.** It has been reported by J. Cheng's group previously,<sup>1</sup> so it is not described here.

**Characterization of CPT-s-s-CPT.** <sup>1</sup>H NMR spectra was recorded on a Bruker AV400 M in CDCl<sub>3</sub> at 25 °C. Chemical shifts were given in parts per million from that of tetramethylsilane (TMS) as an internal reference.

**Preparation of CPT nanoparticles (CPT-NPs).** The CPT-NPs were prepared as follows: 1.45 mg of CPT-s-s-CPT was dissolved in 4 mL of N, N-dimethylformamide (DMF) and stirred for half an hour. Then the solution was added dropwise to 10 mL of deionized water. DMF and unself-assembled CPT-s-s-CPT were removed by dialysis against distilled water (MWCO=1000).

The concentration of CPT-NPs was determined by the UV absorbance at 364 nm for CPT-s-s-CPT, according to the standard calibration curve of CPT-s-s-CPT in DMF. The solution of CPT-NPs was diluted 10 times with DMF, then was measured by UV-vis spectrophotometer performed on Shimadzu UV-2450 PC.

**CPT-NPs characterization.** Size distribution of the CPT-NPs was determined by dynamic light scattering (DLS) with a vertically polarized He-Ne laser (DAWN EOS, Wyatt Technology, U.S.A.). The scattering angle was fixed at 90° and the measurement was carried out at 25 °C. The morphology of the CPT-NPs was

measured by Transmission Electron Microscopy (TEM) performed on a JEOL JEM-1011 electron microscope operating at an acceleration voltage of 100 kV. To prepare the specimen for TEM, a drop of nanoparticles solution was deposited onto a copper grid with a carbon coating. The specimen was air-dried and measured at room temperature. It was also measured by Scanning Electron Microscopy performed on JEOL JXA-840 under an accelerating voltage of 15 kV.

**Cell culture.** The human cervical cancer cell line HeLa and human hepatocarcinoma cell line HepG2 were routinely grown in Dulbecco's Modified Eagle Medium (DMEM) (Gibco) containing 10% FBS (Hyclone). Cells were cultured in a humidified incubator at 37 °C with 5% CO<sub>2</sub>.

**Confocal laser scanning microscopy (CLSM).** HeLa and HepG2 cells were seeded on the coverslip in 6-well plates at a density of  $5 \times 10^5$  cells per well in 1 mL of DMEM medium and incubated in a humidified 5% CO<sub>2</sub> atmosphere for 24 h. For cellular internalization observation, cells were incubated with CPT-NPs at the concentration of 20  $\mu\text{g mL}^{-1}$  in fresh culture medium. After incubation for 0.5 h and 2 h at 37 °C, cells were washed twice with ice-cold PBS and fixed with fresh 4% (w/v) paraformaldehyde for 15 min at room temperature. The cellular localization was visualized under a confocal laser scanning microscope (Carl Zeiss LSM 780).

**In vitro cytotoxicity.** The cytotoxicity of CPT-NPs was measured via MTT (3-(4,5-dimethylthiazol-2-yl)-2,5-diphenyltetrazolium bromide) assay. Briefly, HeLa and HepG2 cells harvested in a logarithmic growth phase were seeded in 96-well plates at a density of  $2 \times 10^3$  cells/well and incubated in DMEM for 24 h. The medium was then

replaced with CPT-NPs at various concentrations from 0.0005 to 5  $\mu\text{g}/\text{mL}$ . At the designated time intervals (48 h), 20  $\mu\text{L}$  of MTT solution in PBS with the concentration of 5  $\text{mg}/\text{mL}$  was added and the plate was incubated for another 4 h at 37  $^{\circ}\text{C}$ . After that, the medium containing MTT was removed and 150  $\mu\text{L}$  of DMSO was added to each well to dissolve the MTT formazan crystals. Finally, the plates were shaken for 3 min, and the absorbance of formazan product was measured at 490 nm by a microplate reader (BioTek, EXL808). Data are presented as means  $\pm$  SD (standard deviation) (n=4).

The reduction-responsiveness of disulfide-based nanomedicines was conducted as follows: HeLa cells harvested in a logarithmic growth phase were seeded in 96-well plates at a density of  $2 \times 10^3$  cells/well and incubated in DMEM for 24 h. GSH with the final concentration of 10 mM was added and cultured with cells for 4 h. Then the medium was removed and the 96-well plates were washed two times, followed by addition of fresh medium and CPT-NPs at various concentrations from 0.0005 to 5  $\mu\text{g}/\text{mL}$ . Subsequently cells were further incubated for 48 h, and cell viability was determined by MTT assay. Cells without GSH treatment were used as control.

**Statistics.** All experiments were performed at least three times and all results are expressed as mean  $\pm$  SD.

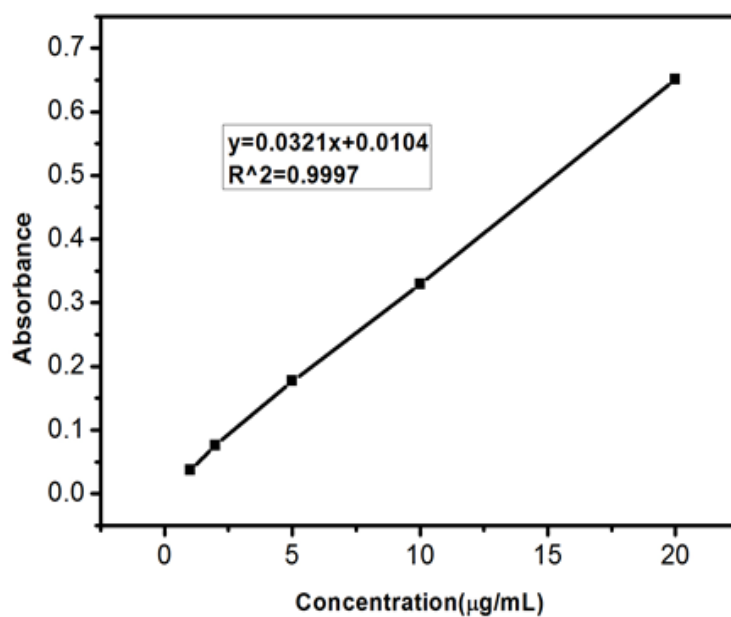

Fig. S1 The UV-vis absorption standard curve of CPT-s-s-CPT in DMF.

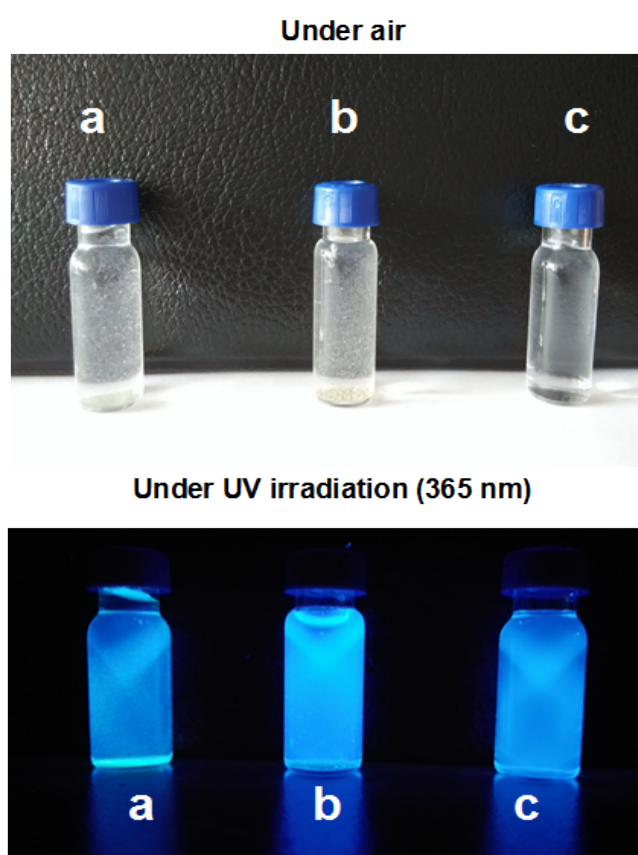

Fig. S2 The picture of CPT (a), CPT-s-s-CPT (b) and CPT-NPs (c) in water.

Fig. S3 SEM image of CPT-NPs.

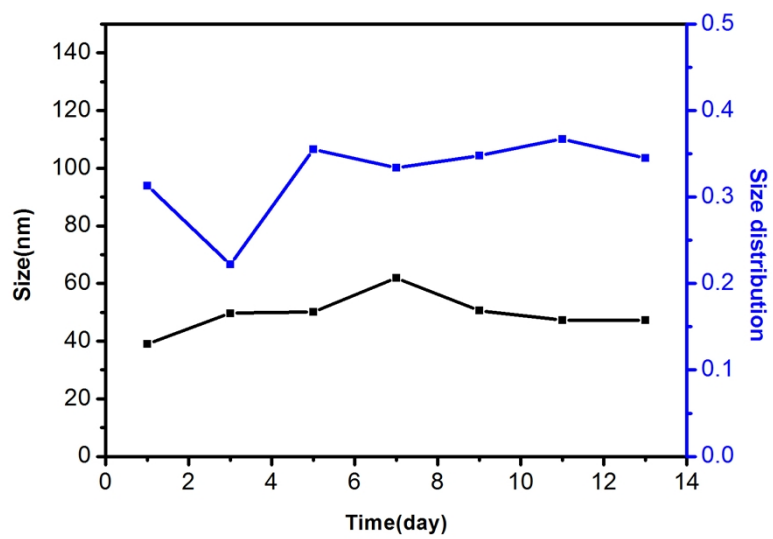

Fig. S4 change of size and size distribution of CPT-NPs with different times determined by DLS.

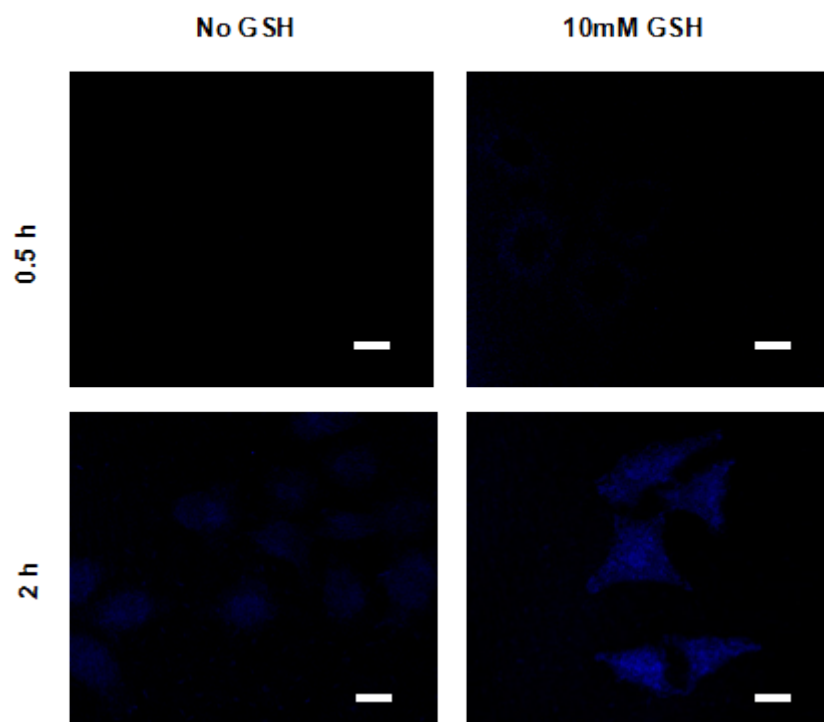

Fig. S5 The cell uptake of CPT-NPs. All scale bars stand for 20  $\mu\text{m}$ .

1 H. Wang, M. Xu, M. Xiong and J. Cheng, *Chemical Communications*, 2015, **51**, 4807-4810.
